# Supplementary material for: Occurrence and preliminarily environmental risk assessment of selected pharmaceuticals in the urban rivers, China
Source: PubMed Central journal article supplement (PMC5054680; doi:10.1038/srep34928), 2016-10-07
Supplement: srep34928-s1.pdf [file srep34928-s1.pdf]

## **SUPPLEMENTARY INFORMATION**

**Occurrence and preliminary environmental risk assessment of selected pharmaceuticals in the urban rivers, China**

**Haidong Zhou\*, Tianqi Ying, Xuelian Wang & Jianbo Liu**

School of Environment and Architecture, University of Shanghai for Science and Technology, Shanghai 200093, China

\* Corresponding author, School of Environment and Architecture, University of Shanghai for Science and Technology, No. 516, Jungong Road, Shanghai 200093, China. Tel/Fax: +86 21 55271722. Email: [zhouhaidong@usst.edu.cn](mailto:zhouhaidong@usst.edu.cn).

**Table S1. Range, and detection frequency (%) of pharmaceuticals in the three urban rivers during four sampling campaigns.**

| Sampling campaign | Measurement         | ATL      | PRC           | STZ      | TMP      | CAF           | AZM                    | PNL      | CBM       | CLM      | CLF        | DCF       | IBU        |
|-------------------|---------------------|----------|---------------|----------|----------|---------------|------------------------|----------|-----------|----------|------------|-----------|------------|
| 1 <sup>a</sup>    | Range (ng/L)        | 0.6-91.1 | 12.4-728      | 0.4-8.2  | 3.8-25.6 | 85.4-2729.3   | 16.6-67.3              | 0.1-3.8  | 13.9-29.5 | 2.6-41.5 | 19.9-299.3 | 12.3-43.5 | 31-116.9   |
|                   | FD <sup>e</sup> (%) | 100      | 100           | 100      | 100      | 100           | 100                    | 100      | 100       | 100      | 100        | 100       | 100        |
| 2 <sup>b</sup>    | Range (ng/L)        | 2.4-7.9  | 2.3-1905.8    | 2-7.9    | 5.7-14.9 | 114.5-6868.8  | n.d. <sup>f</sup> -8.3 | n.d.-1.2 | 12.5-17.8 | 2-47.7   | n.d.-11    | 15.1-54.4 | n.d.-140.2 |
|                   | FD (%)              | 100      | 100           | 100      | 100      | 100           | 94                     | 72       | 100       | 100      | 61         | 100       | 94         |
| 3 <sup>c</sup>    | Range (ng/L)        | 0.4-9.0  | 19.6-2744.7   | n.d.-1.9 | 2.9-12.9 | 66.3-3888.0   | n.d.-15.4              | n.d.-8.8 | 8.6-16.1  | 0.8-39.8 | 1.2-5.1    | 5-32.1    | 7.3-58.6   |
|                   | FD (%)              | 100      | 100           | 94       | 100      | 100           | 83                     | 83       | 100       | 100      | 100        | 100       | 100        |
| 4 <sup>d</sup>    | Range (ng/L)        | 0.9-3.7  | 1658.8-7023.7 | 10.3-56  | 5.3-16   | 3569.7-8662.4 | n.d.-38.9              | n.d.-2   | 0.6-8.9   | n.d.-41  | n.d.-3.8   | 1.8-63.8  | 43.4-194.6 |
|                   | FD (%)              | 100      | 100           | 100      | 100      | 100           | 56                     | 67       | 100       | 72       | 56         | 100       | 100        |

**Note:** <sup>a</sup> From May 28 to June 2, 2014, <sup>b</sup> September 12, 2014, <sup>c</sup> November 30, 2014, <sup>d</sup> January 29, 2015, <sup>e</sup> Frequency of detection (%), <sup>f</sup> Not detected (<LOQ).

**Table S2. Physicochemical properties of the target pharmaceuticals in this study.**

| Compounds            | Therapeutic groups                            | CAS No.                      | Molecular formula                                                          | Molecular Weight | Molecule structure | logKow            | pKa               |
|----------------------|-----------------------------------------------|------------------------------|----------------------------------------------------------------------------|------------------|--------------------|-------------------|-------------------|
| Azithromycin (AZM)   | macrolides antibiotics                        | 83905-01-5                   | C <sub>38</sub> H <sub>72</sub> N <sub>2</sub> O <sub>12</sub>             | 749.0            |                    | 4.02 <sup>a</sup> | 8.7 <sup>a</sup>  |
| Clarithromycin (CLM) | macrolides antibiotics                        | 81103-11-9                   | C <sub>38</sub> H <sub>69</sub> NO <sub>13</sub>                           | 748.0            |                    | 3.16 <sup>a</sup> | 8.99 <sup>e</sup> |
| Sulfathiazole (STZ)  | Antimicrobial sulfonamides                    | 72-14-0                      | C <sub>9</sub> H <sub>9</sub> N <sub>3</sub> O <sub>2</sub> S <sub>2</sub> | 255.3            |                    | 0.89 <sup>d</sup> | 7.29 <sup>d</sup> |
| Trimethoprim (TMP)   | Broad spectrum antibiotics                    | 738-70-5                     | C <sub>14</sub> H <sub>18</sub> N <sub>4</sub> O <sub>3</sub>              | 290.3            |                    | 0.91 <sup>d</sup> | 7.12 <sup>d</sup> |
| Ibuprofen (IBU)      | Anti-inflammatory/analgesic drugs             | 15687-27-1                   | C <sub>13</sub> H <sub>18</sub> O <sub>2</sub>                             | 206.3            |                    | 3.97 <sup>a</sup> | 4.91 <sup>a</sup> |
| Diclofenac (DCF)     | Non steroidal anti-inflammatory drugs (NSAID) | 15307-79-6(Na)<br>15307-86-5 | C <sub>10</sub> H <sub>11</sub> ClO <sub>3</sub>                           | 214.6            |                    | 4.51 <sup>a</sup> | 4.15 <sup>a</sup> |

|                           |                                  |            |                                                               |       |                    |                   |
|---------------------------|----------------------------------|------------|---------------------------------------------------------------|-------|--------------------|-------------------|
| Paracetamol<br>(PRC)      | Antipyretic analgesics           | 103-90-2   | C <sub>8</sub> H <sub>9</sub> NO <sub>2</sub>                 | 151.2 | 0.46 <sup>a</sup>  | 9.38 <sup>a</sup> |
| Atenolol<br>(ATL)         | Cardioselective beta<br>blockers | 29122-68-7 | C <sub>14</sub> H <sub>22</sub> N <sub>2</sub> O <sub>3</sub> | 266.3 | 0.16 <sup>a</sup>  | 9.6 <sup>e</sup>  |
| Propranolol<br>(PNL)      | Beta-blockers                    | 525-66-6   | C <sub>16</sub> H <sub>21</sub> NO <sub>2</sub>               | 259.4 | 3.48 <sup>a</sup>  | 9.1 <sup>b</sup>  |
| Clofibrilic acid<br>(CLF) | Lipid regulators                 | 882-09-7   | C <sub>10</sub> H <sub>11</sub> ClO <sub>3</sub>              | 214.6 | 2.57 <sup>b</sup>  | 3.2 <sup>b</sup>  |
| Carbamazepine<br>(CBZ)    | Psychiatric-<br>antiepileptics   | 298-46-4   | C <sub>15</sub> H <sub>12</sub> N <sub>2</sub> O              | 236.3 | 2.45 <sup>d</sup>  | 7.0 <sup>d</sup>  |
| Caffeine<br>(CAF)         | Psychomotor stimulants           | 58-08-2    | C <sub>8</sub> H <sub>10</sub> N <sub>4</sub> O <sub>2</sub>  | 194.2 | -0.07 <sup>a</sup> | 10.4 <sup>a</sup> |

Note: <sup>a</sup> Data from Kosma et al.<sup>1</sup>; <sup>b</sup> Data from Camacho- Muñoz et al.<sup>2</sup>; <sup>c</sup> Data from Zhang et al.<sup>3</sup>; <sup>d</sup> Data from Kim et al.<sup>4</sup>; <sup>e</sup> Data from the manufacturers.

**Table S3. Details of sampling along Qiujiang (QJ) River, Dongzoumatang (DZM) River and Yangshupugang (YSP) River in Shanghai, China.**

| <b>River</b> | <b>Flow rate<br/>(m<sup>3</sup>/s)</b> | <b>Length<br/>(km)</b> | <b>Width<br/>(m)</b> | <b>Depth<br/>(m)</b>                         | <b>Sampling<br/>section</b> | <b>Sampling campaign</b>                                                              |
|--------------|----------------------------------------|------------------------|----------------------|----------------------------------------------|-----------------------------|---------------------------------------------------------------------------------------|
| <b>QJ</b>    | 5.4-24.0                               | 7.0                    | 30-40                | 0.8-1.8 <sup>a</sup><br>3.9-4.0 <sup>b</sup> | Q1-Q6                       | May 28 to June 2, 2014<br>September 12, 2014<br>November 30, 2014<br>January 29, 2015 |
| <b>DZM</b>   | 4.8-20.5                               | 5.0                    | 20-30                | 2.2-2.4 <sup>a</sup><br>3.8-4.0 <sup>b</sup> | D1-D6                       |                                                                                       |
| <b>YSP</b>   | 14.2-28.3                              | 4.5                    | ~27                  | ~3.5                                         | Y1-Y6                       |                                                                                       |

Note: <sup>a</sup> Depth during the normal low water level; <sup>b</sup> Depth during the normal high water level.

**Table S4. Retention times and their optimal MS/MS parameters using hot electrospray ionization of target pharmaceuticals.**

| Compound                 | Mw (Da) | Precursor ion (m/z) | Product ion (m/z) | Collision energy (eV) | S-Lens RF (v) | Ionization mode | Retention time (min) |
|--------------------------|---------|---------------------|-------------------|-----------------------|---------------|-----------------|----------------------|
| <b>PNL</b>               | 259.4   | 260.2               | 116.1 *           | 17                    | 85            | HESI+           | 5.93                 |
|                          |         |                     | 183.1             | 17                    | 85            |                 |                      |
| <b>AZM</b>               | 749.0   | 749.5               | 591.5 *           | 24                    | 163           | HESI+           | 5.32                 |
|                          |         |                     | 158.1             | 37                    | 79            |                 |                      |
| <b>CBZ</b>               | 236.3   | 237.1               | 194.1 *           | 19                    | 77            | HESI+           | 6.61                 |
|                          |         |                     | 193.1             | 33                    | 77            |                 |                      |
| <b>CLM</b>               | 748.0   | 748.4               | 158.1 *           | 26                    | 129           | HESI+           | 7.14                 |
|                          |         |                     | 590.5             | 14                    | 129           |                 |                      |
| <b>STZ</b>               | 255.3   | 256.0               | 156.0 *           | 14                    | 71            | HESI+           | 2.72                 |
|                          |         |                     | 108.1             | 23                    | 71            |                 |                      |
| <b>TMP</b>               | 290.3   | 291.1               | 230.1 *           | 23                    | 109           | HESI+           | 3.74                 |
|                          |         |                     | 261.1             | 24                    | 109           |                 |                      |
| <b>ATL</b>               | 266.3   | 267.1               | 145.1 *           | 25                    | 86            | HESI+           | 1.80                 |
|                          |         |                     | 190.1             | 17                    | 86            |                 |                      |
| <b>PRC</b>               | 151.2   | 152.0               | 110.1 *           | 15                    | 66            | HESI+           | 2.44                 |
|                          |         |                     | 65                | 29                    | 66            |                 |                      |
| <b>CAF</b>               | 194.2   | 195.1               | 138.1 *           | 19                    | 79            | HESI+           | 3.98                 |
|                          |         |                     | 110.1             | 33                    | 79            |                 |                      |
| <b>IBU</b>               | 206.3   | 205.0               | 161.0 *           | 7                     | 42            | HESI-           | 7.32                 |
| <b>CLF</b>               | 214.6   | 213.0               | 127.0 *           | 20                    | 53            | HESI-           | 5.98                 |
| <b>DCF</b>               | 296.2   | 294.0               | 250.1 *           | 14                    | 59            | HESI-           | 7.15                 |
|                          |         |                     | 214.1             | 21                    | 59            |                 |                      |
| <b>PRC-d<sub>3</sub></b> | 154.2   | 155.1               | 111.1*            | 15                    | 74            | HESI+           | 2.43                 |
|                          |         |                     | 93.1              | 21                    | 74            |                 |                      |
|                          |         |                     | 107.1*            | 19                    | 57            | HESI-           | 2.38                 |
|                          |         |                     | 118.1             | 34                    | 57            |                 |                      |
| <b>STZ-d<sub>4</sub></b> | 259.3   | 260.0               | 160.0*            | 14                    | 84            | HESI+           | 2.68                 |
|                          |         |                     | 96.1              | 25                    | 84            |                 |                      |
|                          |         |                     | 160.0*            | 19                    | 58            |                 |                      |
| 258.0                    | 20      | 58                  |                   |                       |               |                 |                      |

Note: \* product ion for quantification.

## References

1. Kosma, C. I., Lambropoulou, D. A. & Albanis, T. A. Occurrence and removal of PPCPs in municipal and hospital wastewaters in Greece. *J. Hazard. Mater.* **179**(1–3), 804-817 (2010).
2. Camacho-Muñoz, D., Martín, J., Santos, J. L., Aparicio, I. & Alonso, E. Distribution and Risk Assessment of Pharmaceutical Compounds in River Sediments from Doñana Park (Spain). *Water, Air, & Soil Pollution* **224**(10), 1665 (2013).
3. Zhang, N., Liu, G., Liu, H., Wang, Y., He, Z. & Wang, G. Diclofenac photodegradation under simulated sunlight: Effect of different forms of nitrogen and kinetics. *J. Hazard. Mater.* **192**(1), 411-418 (2011).
4. Kim, Y., Choi, K., Jung, J., Park, S., Kim, P.-G. & Park, J. Aquatic toxicity of acetaminophen, carbamazepine, cimetidine, diltiazem and six major sulfonamides, and their potential ecological risks in Korea. *Environ. Int.* **33**(3), 370-375 (2007).
